# Supplementary material
Source: PubMed Central journal article supplement (PMC3383355)
Supplement: NIHMS355057-supplement-1.pdf [file NIHMS355057-supplement-1.pdf]

**Appendix A, Supplemental Digital Content 1.** Summary of responses to Questions 6-24 on the PDA “long form” survey. These questions were asked when a hearing problem situation was reported to occur “since the last alert,” i.e. “yes” to Question 1. Arrows in this table indicate branching follow-up questions when a “yes” response was entered by the participant.

Summary of responses to Questions 6-24 on the PDA “long form” questionnaire. These questions were asked when a hearing problem situation was reported to occur “since the last alert,” i.e. “yes” to Question 1 (n=372).

|                                                                                                               | Mean                    | SD    |
|---------------------------------------------------------------------------------------------------------------|-------------------------|-------|
| <b>Question 6:</b> How much of a problem was noise in your surroundings? (scale 1-7)                          | 4.0                     | 2.1   |
| <b>Question 7:</b> How much hearing difficulty did you have in the situation? (scale 1-7)                     | 5.1                     | 1.4   |
| <b>Question 8:</b> How important to you was hearing in this situation? (scale 1-7)                            | 5.4                     | 1.5   |
| <b>Question 9:</b> How much did the hearing problem in this situation annoy, bother or upset you? (scale 1-7) | 3.7                     | 1.6   |
| <b>Question 10:</b> Did other people seem annoyed, bothered or upset by the hearing problem?                  | Number of Responses (%) |       |
| Not at all                                                                                                    | 122                     | 32.8% |
| I was alone                                                                                                   | 54                      | 14.5% |
| Yes                                                                                                           | 43                      | 11.6% |
| No                                                                                                            | 63                      | 16.9% |
| Don't know                                                                                                    | 90                      | 24.2% |
| Total:                                                                                                        | 372                     |       |

| Question 11: Were you wearing your hearing aids during this hearing problem situation? | Number of Responses (%) |       | → | If 'Yes' to Question 11                                                        |     |     |
|----------------------------------------------------------------------------------------|-------------------------|-------|---|--------------------------------------------------------------------------------|-----|-----|
|                                                                                        | Mean                    | SD    |   | Mean                                                                           | SD  |     |
| Yes                                                                                    | 286                     | 76.9% | → | <b>Question 12:</b> How much did your hearing aids help you? (scale 1-7)       | 4.6 | 1.6 |
| No                                                                                     | 86                      | 23.1% |   | <b>Question 13:</b> How satisfied were you with your hearing aids? (scale 1-7) | 4.9 | 1.6 |
| Total:                                                                                 | 372                     |       |   |                                                                                |     |     |

| Question 14: Did you say or do something to deal with the difficulty in this situation? | Number of Responses (%) |       | →                                                                 | If 'Yes' to Question 14                     |                         |       |
|-----------------------------------------------------------------------------------------|-------------------------|-------|-------------------------------------------------------------------|---------------------------------------------|-------------------------|-------|
|                                                                                         | Mean                    | SD    |                                                                   | Mean                                        | SD                      |       |
| Yes                                                                                     | 257                     | 69.1% | →                                                                 | <b>Question 15:</b> What did you say or do? | Number of Responses (%) |       |
| No                                                                                      | 115                     | 30.9% |                                                                   | Said something to help                      | 83                      | 32.3% |
| Total:                                                                                  | 372                     |       |                                                                   | Moved to a better location                  | 29                      | 11.3% |
|                                                                                         |                         |       |                                                                   | Modified the environment                    | 80                      | 31.1% |
|                                                                                         |                         |       |                                                                   | Relaxed myself                              | 14                      | 5.4%  |
|                                                                                         |                         |       |                                                                   | Said/did something else                     | 51                      | 19.9% |
|                                                                                         |                         |       |                                                                   | Subtotal:                                   | 257                     |       |
|                                                                                         |                         |       |                                                                   | Mean                                        | SD                      |       |
|                                                                                         |                         |       | <b>Question 16:</b> Was what you said or did helpful? (scale 1-7) | 5.7                                         | 1.3                     |       |

|                                                                                   |                         |       |
|-----------------------------------------------------------------------------------|-------------------------|-------|
| <b>Question 17:</b> How satisfied were you with what you said or did? (scale 1-7) | 5.8                     | 1.1   |
| <b>Question 18:</b> Where did you learn what you said or did?                     | Number of Responses (%) |       |
| Audiologist or dealer                                                             | 19                      | 7.4%  |
| Workshop, lecture, etc.                                                           | 53                      | 20.6% |
| Thought of / found myself                                                         | 154                     | 59.9% |
| Friend, relative, etc.                                                            | 5                       | 2.0%  |
| Don't know or other                                                               | 26                      | 10.1% |
| Subtotal:                                                                         | 257                     |       |

**Question 19:** Did you use another device besides hearing aids to deal with the hearing difficulty?

|        | Number of Responses (%) |       |
|--------|-------------------------|-------|
| Yes    | 45                      | 12.1% |
| No     | 327                     | 87.9% |
| Total: | 372                     |       |

| If 'Yes' to Question 19                                                 | Mean | SD  |
|-------------------------------------------------------------------------|------|-----|
| <b>Question 20:</b> Was this other device helpful? (scale 1-7)          | 5.8  | 1.3 |
| <b>Question 21:</b> How satisfied were you with the device? (scale 1-7) | 5.9  | 1.4 |

|                                                       |                         |       |
|-------------------------------------------------------|-------------------------|-------|
| <b>Question 22:</b> Did you learn of the device from: | Number of Responses (%) |       |
| Audiologist or dealer                                 | 17                      | 37.8% |
| Workshop, lecture, etc.                               | 10                      | 22.2% |
| Thought of / found myself                             | 14                      | 31.1% |
| Friend, relative, etc.                                | 1                       | 2.2%  |
| Don't know or other                                   | 3                       | 6.7%  |
| Subtotal                                              | 45                      |       |

**Question 23:** How many hearing problem situations have you had since the last alert?

|               | Number of Responses (%) |       |
|---------------|-------------------------|-------|
| None          | 19                      | 5.1%  |
| One           | 190                     | 51.1% |
| Two           | 87                      | 23.4% |
| Three or more | 76                      | 20.4% |
| Total:        | 372                     |       |

**Question 24:** How often did you wear your hearing aids since the last alert? (scale 1-7)

| Mean | SD  |
|------|-----|
| 5.5  | 2.1 |
