# Supplementary material
Source: PubMed Central journal article supplement (PMC3383355)

**Appendix B, Supplemental Digital Content 2.** For each of 23 participants, the total number of responses per day and the number of responses indicating a hearing problem situation are plotted across the 14-day EMA testing period. Normally a participant could respond up to 4 times in one day (once per time block), however in some cases 5 responses were recorded in one day. This was due to the random alert scheduling program that sometimes created 5 alerts instead of 4 in one day. One participant lost the device during the testing period resulting in missing data.

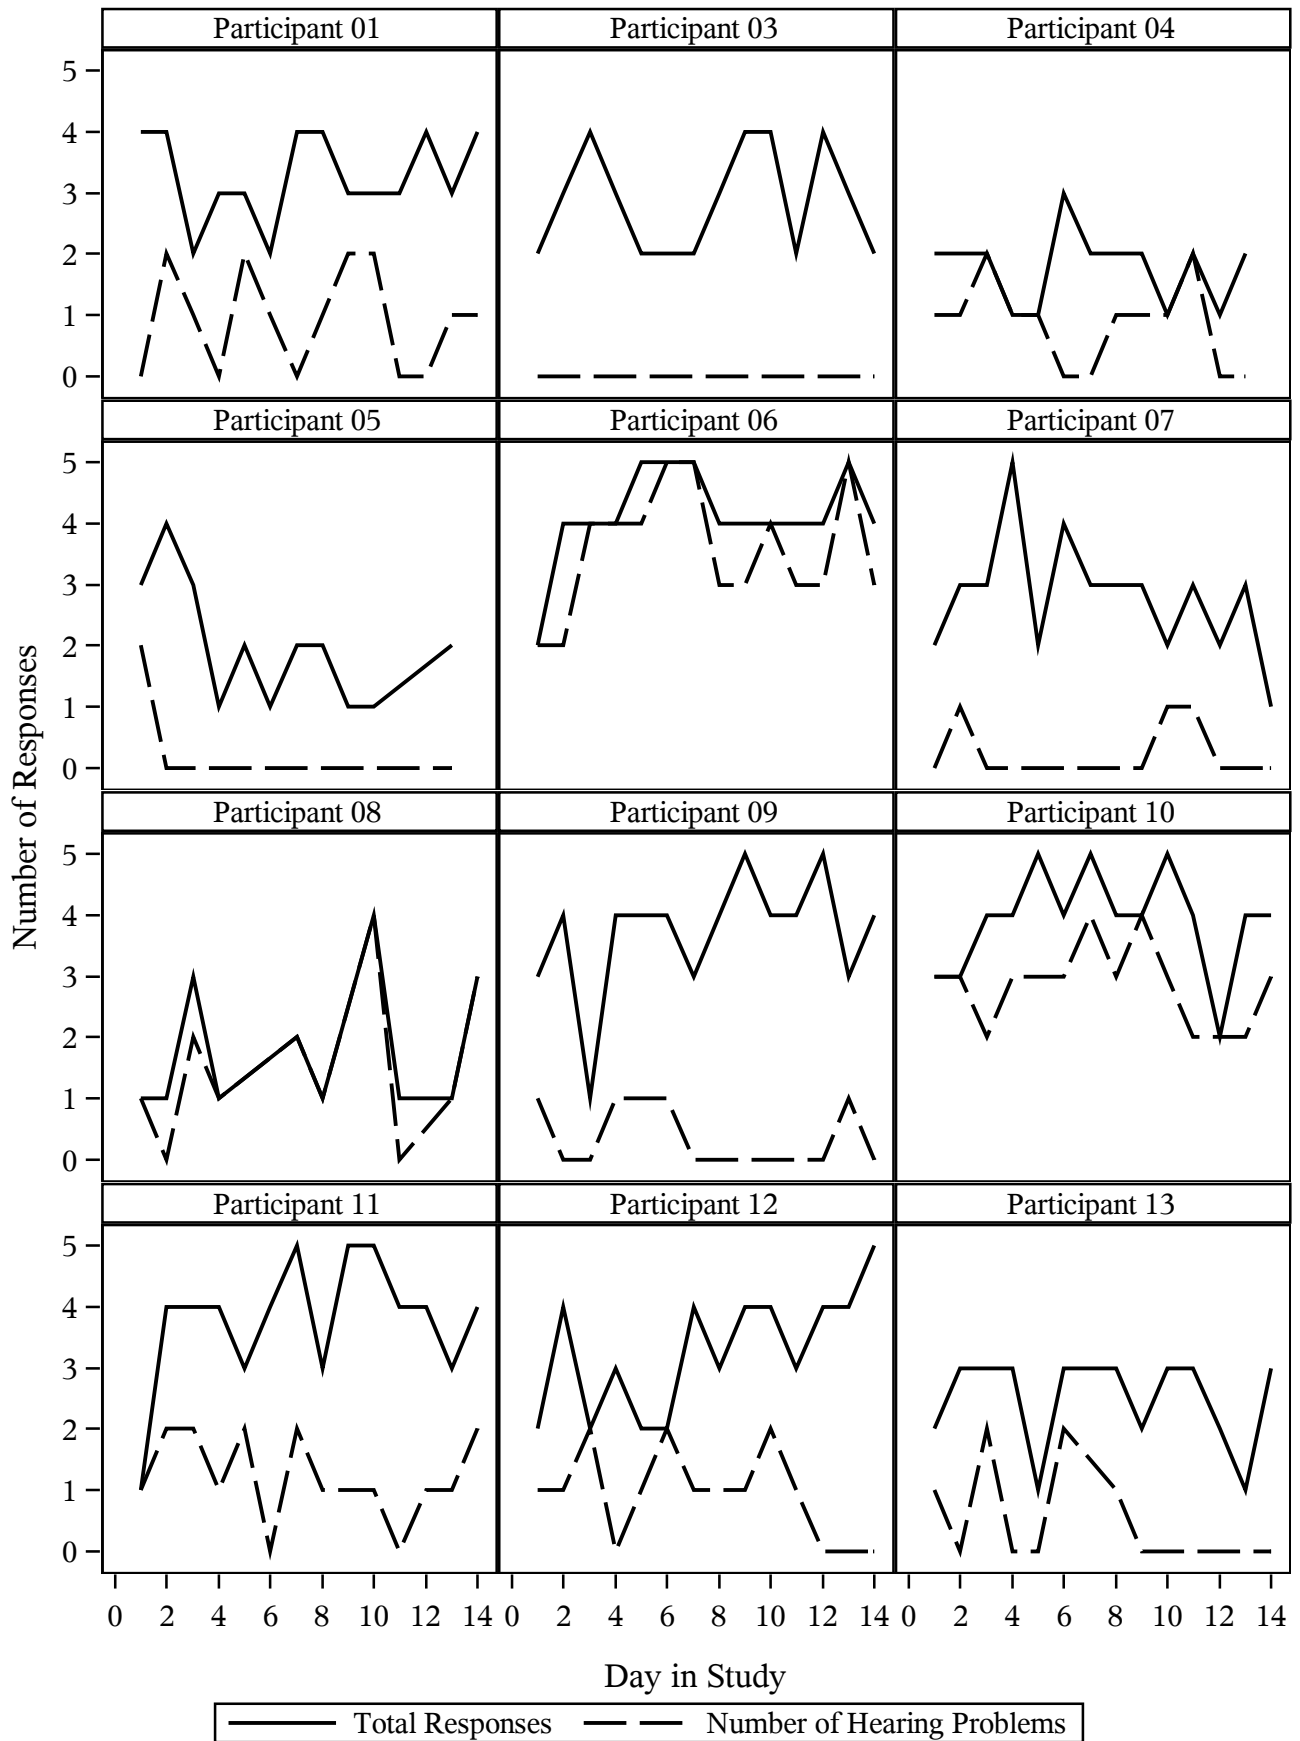

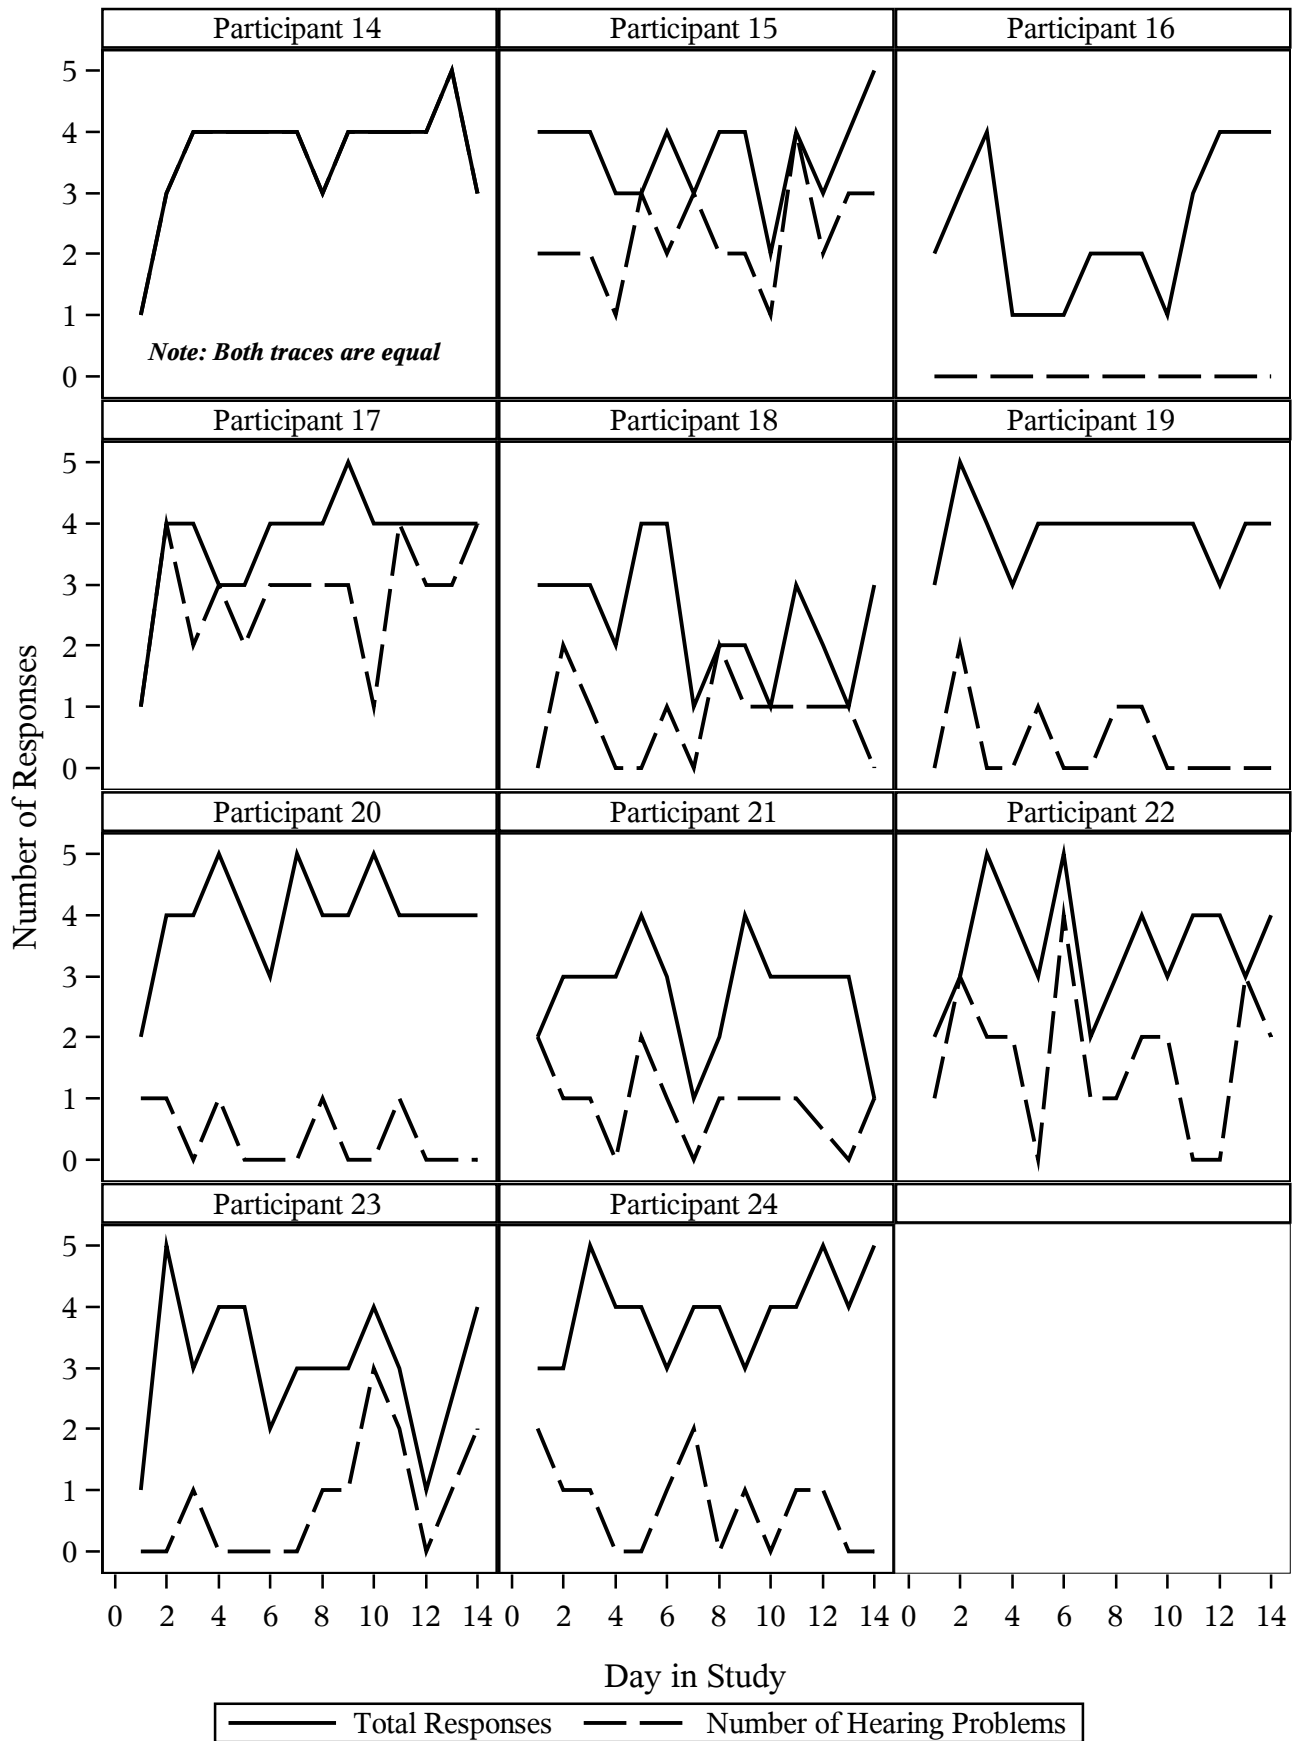

Supplement: NIHMS355057-supplement-2.pdf [file NIHMS355057-supplement-2.pdf]
