# Supplementary material
Source: PubMed Central journal article supplement (PMC3383355)
Supplement: NIHMS355057-supplement-3.pdf [file NIHMS355057-supplement-3.pdf]

**Appendix C, Supplemental Digital Content 3.** An example of a summary report that could be produced for an individual using EMA data for clinical purposes. For this example, mocked-up data was used to generate the tables and charts, i.e. this does not correspond to the responses given by any participant in the current study.

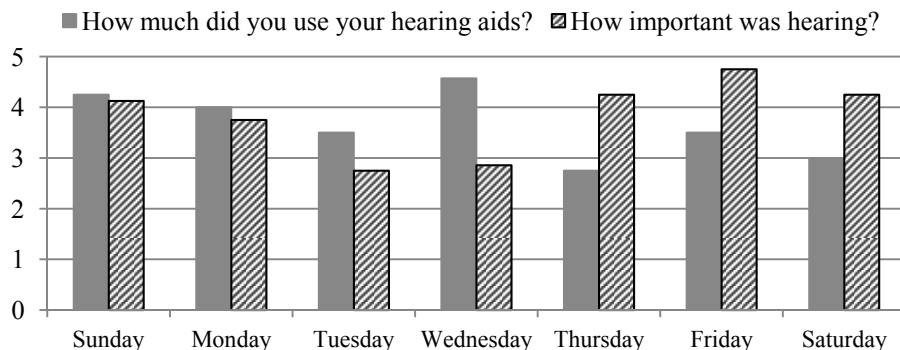

Patient: \_\_\_\_\_

Start date: \_\_\_\_\_

End date: \_\_\_\_\_

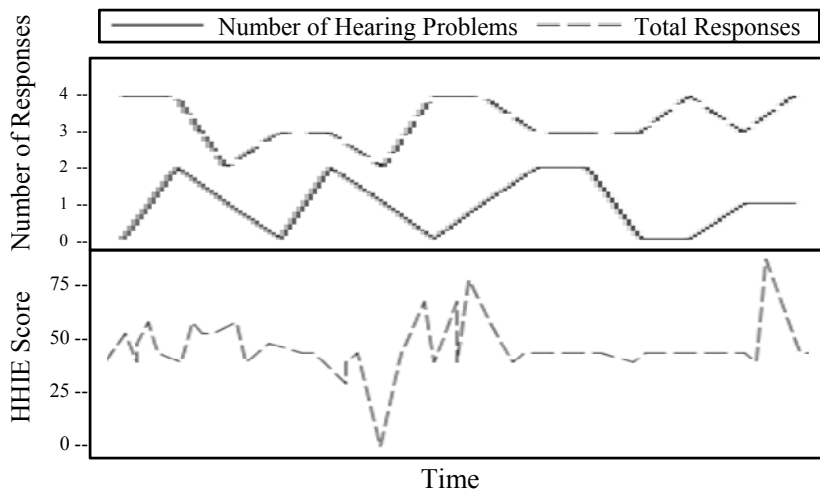

|                                 |     | Were you wearing hearing aids? |             | Total |
|---------------------------------|-----|--------------------------------|-------------|-------|
|                                 |     | No                             | Yes         |       |
| Did you have a hearing problem? | No  | 10<br>62.5%                    | 6<br>37.5%  | 16    |
|                                 | Yes | 14<br>51.9%                    | 13<br>48.1% | 27    |
| Total                           |     | 24                             | 19          | 43    |

|                                 |     | Did you use another device? |            | Total |
|---------------------------------|-----|-----------------------------|------------|-------|
|                                 |     | No                          | Yes        |       |
| Did you have a hearing problem? | No  | 14<br>87.5%                 | 2<br>12.5% | 16    |
|                                 | Yes | 26<br>96.3%                 | 1<br>3.7%  | 27    |
| Total                           |     | 40                          | 3          | 43    |

### Hearing problem situations encountered over the week.

| Hearing Problem Type      | Number of Responses<br>(% of Total Problems) | Wearing Hearing Aids?<br>(% of Hearing Problem) | Follow-up question (if applicable) | Number of Responses<br>(% of Subtotal) |
|---------------------------|----------------------------------------------|-------------------------------------------------|------------------------------------|----------------------------------------|
| Face-to-face conversation | 10 (37.0%)                                   | 4 (40%)                                         | → Conversation with: One person    | 8 (80%)                                |
|                           |                                              |                                                 | Two people                         | 1 (10%)                                |
|                           |                                              |                                                 | Three or more people               | 1 (10%)                                |
|                           |                                              |                                                 | <b>Subtotal:</b>                   | <b>10</b>                              |
| Telephone conversation    | 5 (18.5%)                                    | 3 (60%)                                         | → Who with: Someone familiar       | 4 (80%)                                |
|                           |                                              |                                                 | Someone unfamiliar                 | 1 (20%)                                |
|                           |                                              |                                                 | <b>Subtotal:</b>                   | <b>5</b>                               |
| TV, radio, iPod, etc.     | 4 (14.8%)                                    | 0 (0%)                                          | → Volume adjusted for: Myself      | 4 (100%)                               |
|                           |                                              |                                                 | Others                             | 0 (0%)                                 |
|                           |                                              |                                                 | <b>Subtotal:</b>                   | <b>4</b>                               |
| Movie, lecture, etc.      | 1 (3.7%)                                     | 1 (100%)                                        |                                    |                                        |
| Environmental sounds      | 2 (7.4%)                                     | 2 (100%)                                        |                                    |                                        |
| Other                     | 5 (18.5%)                                    | 3 (60%)                                         |                                    |                                        |
| <b>Total:</b>             | <b>27</b>                                    | <b>13 48.1%</b>                                 |                                    |                                        |

Note. This report is for illustrative purposes only. The data used to generate the report does not represent data from the current study.
